# Supplementary material for: New palladium(ii) and platinum(ii) complexes with an ONS donor azo-thioether pincer ligand: synthesis, characterization, protein binding study and in vitro cytotoxicity
Source: Royal Society of Chemistry journal article supplement (doi:10.1039/d3nj00334e), 2023-01-01
Supplement: d3nj00334e1.pdf [file d3nj00334e1.pdf]

## Supporting Information

### **New palladium(II) and platinum(II) complexes with ONS donor azo-thioether pincer ligand: Synthesis, characterization, protein binding study and in vitro cytotoxicity**

**Akash Das,<sup>a</sup> Moumita Saha,<sup>b</sup> Subrata Mandal,<sup>a</sup> Sanjib Das,<sup>b</sup> Krishna Das Saha<sup>\*b</sup> and Tapan K. Mondal<sup>\*a</sup>**

<sup>a</sup>Department of Chemistry, Jadavpur University, Kolkata- 700032, India. E-mail: [tapank.mondal@jadavpuruniversity.in](mailto:tapank.mondal@jadavpuruniversity.in)

<sup>b</sup>Cancer Biology & Inflammatory Disorder Division, CSIR-Indian Institute of Chemical Biology, Kolkata – 700 032, India

### CONTENTS

Fig. S1: <sup>1</sup>H-NMR spectrum of [Pd(L)Cl] (**1**) in CDCl<sub>3</sub>

Fig. S2: <sup>1</sup>H-NMR spectrum of [Pt(L)Cl] (**2**) in CDCl<sub>3</sub>

Fig. S3: HRMS of Pd(II) complex

Fig. S4: HRMS of Pt(II) complex

Fig. S5: IR spectrum of free HL

Fig. S6: IR spectrum of complex **1**

Fig. S7: IR spectrum of complex **2**

Table S1: Crystallographic data and refinement parameters of complexes **1** and **2**

Table S2: Selected X-ray and calculated bond distances and angles of complexes **1** and **2**

Table S3: Energy and composition of some selected molecular orbitals of **Pd(II)** complex

Table S4: Energy and composition of some selected molecular orbitals of **Pt(II)** complex

Table S5: Vertical electronic transition calculated by TDDFT/CPCM method of complexes **1** and **2**

Fig. S8: 1-D supramolecular structure of **2** formed by Cl...H and O...H bonding interactions.

Fig. S9: Contour plots of some selected molecular orbital of **Pd(II)** complex (**1**)

Fig. S10: Contour plots of some selected molecular orbital of **Pt(II)** complex (**2**)

Fig. S11: Spin density plots of (A) **1**<sup>+</sup> and (B) **2**<sup>+</sup>

Fig. S12: Spin density plots of (A) **1**<sup>-</sup> and (B) **2**<sup>-</sup>

Fig. S13: Plot of log [(F<sub>o</sub>-F)/F] versus log [complex] of **Pd(II)** complex (A) and **Pt(II)** complex (B)

Fig. S14: (A) Viability of A549, HepG2 and HCT116 cells were assessed by treating different dose of HL and (B) the effects of [Pd(L)Cl] (**1**) and [Pt(L)Cl] (**2**) in peripheral blood mononuclear cells (PBMCs)

Fig. S15: Viability of A549, HepG2 and HCT116 cells towards doxorubicin (Dox)

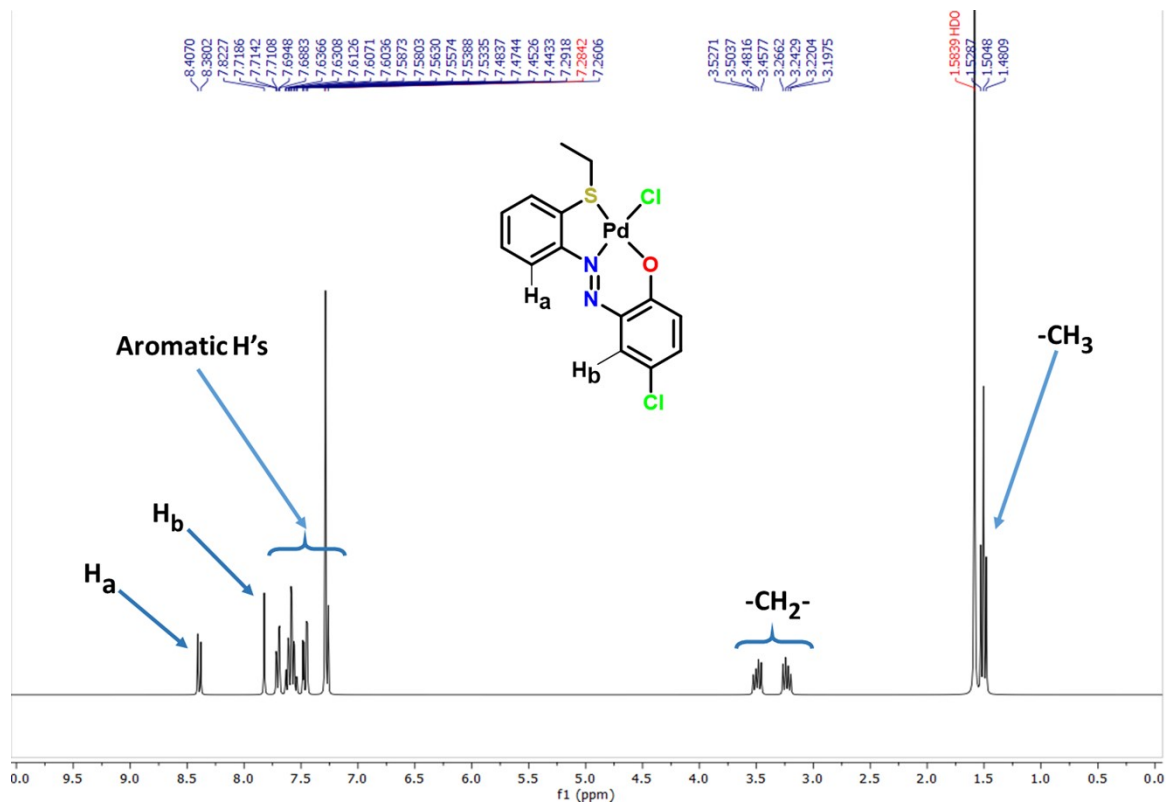

Figure S1: <sup>1</sup>H-NMR spectrum of [Pd(L)Cl] (1) in CDCl<sub>3</sub>

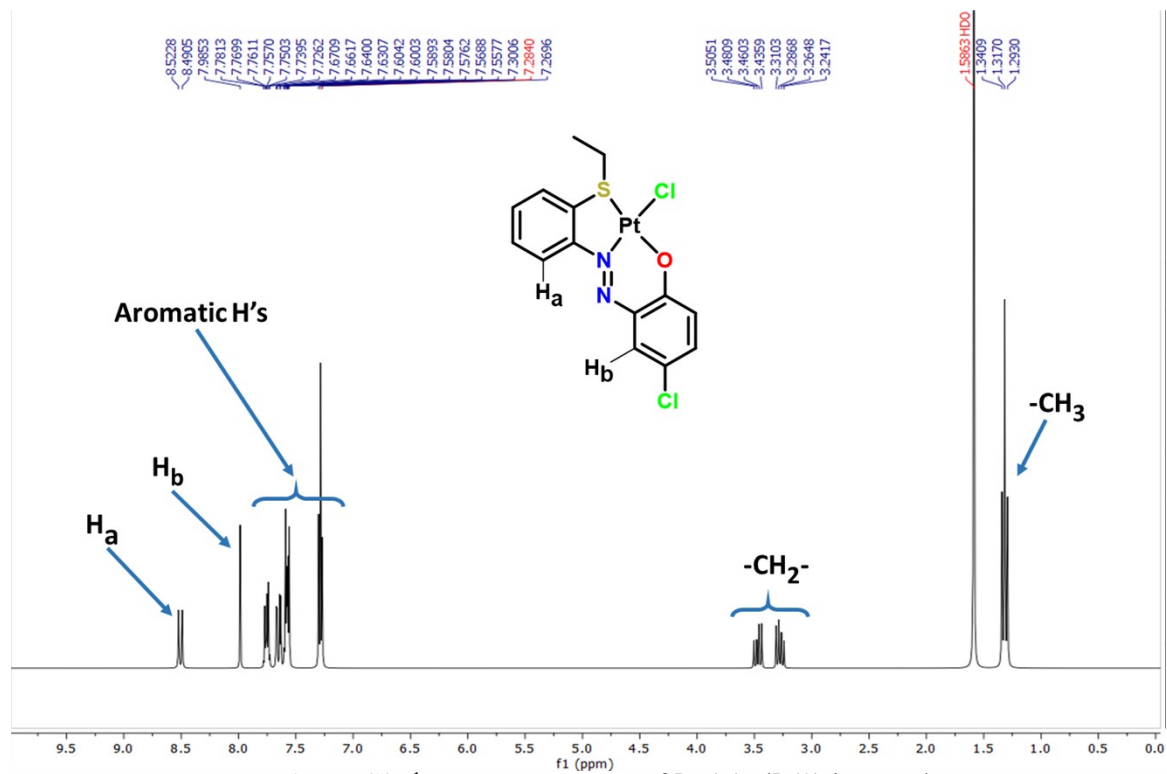

Figure S2: <sup>1</sup>H-NMR spectrum of [Pt(L)Cl] (2) in CDCl<sub>3</sub>

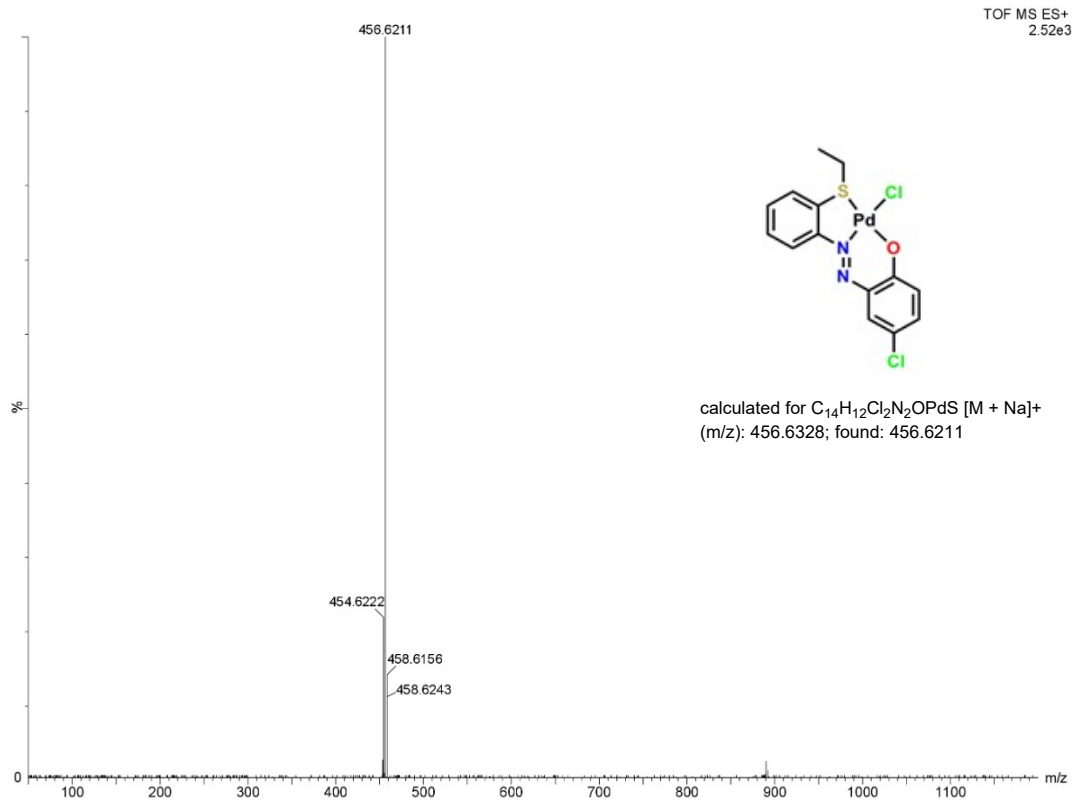

**Figure S3:** HRMS spectrum of [Pd(L)Cl] (1)

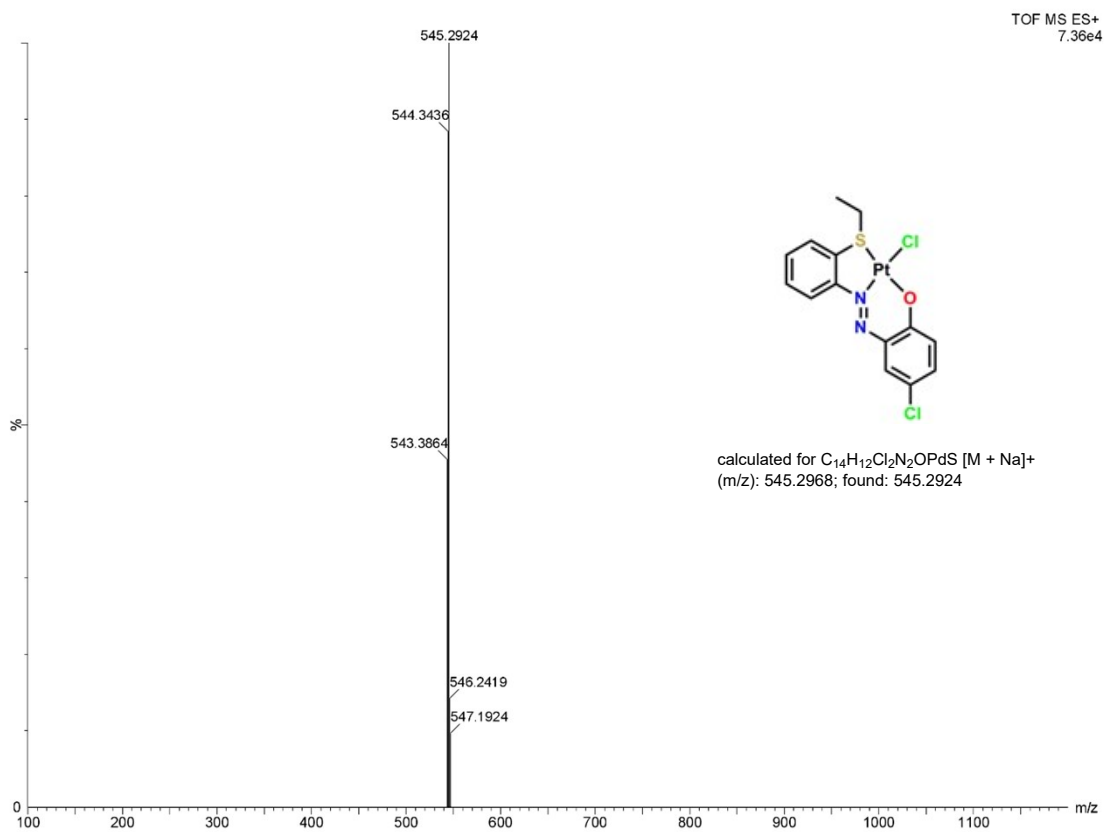

**Figure S4:** HRMS spectrum of [Pt(L)Cl] (2)

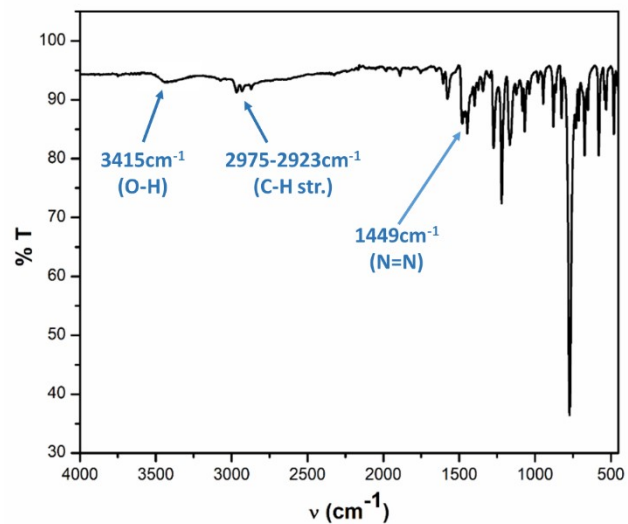

**Figure S5:** IR spectrum of free HL

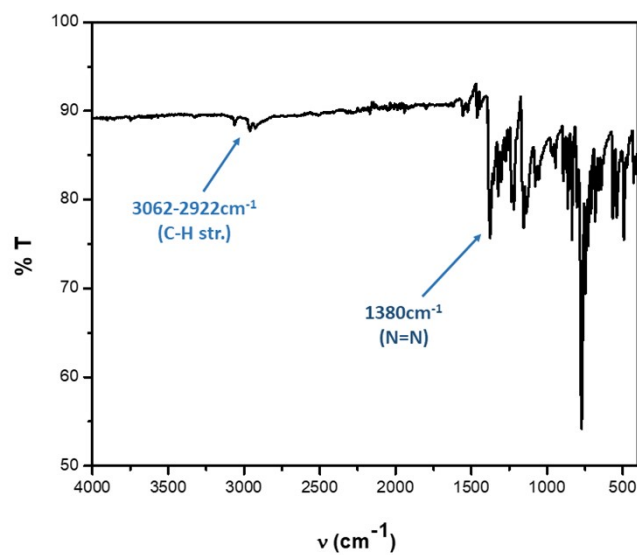

**Figure S6:** IR spectrum of complex 1

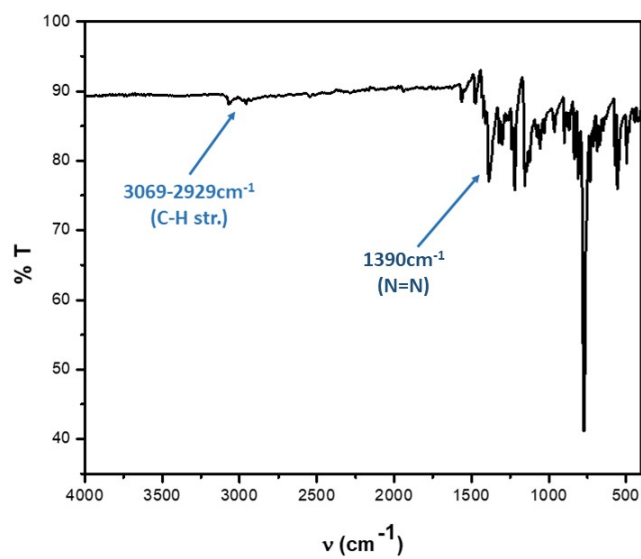

**Figure S7:** IR spectrum of complex 2

**Table S1:** Crystallographic data and refinement parameters of **1** and **2**

|                              |                                                                     |                                                                                                              |
|------------------------------|---------------------------------------------------------------------|--------------------------------------------------------------------------------------------------------------|
| Formula                      | C <sub>14</sub> H <sub>12</sub> Cl <sub>2</sub> N <sub>2</sub> OPdS | C <sub>28</sub> H <sub>24</sub> Cl <sub>4</sub> N <sub>4</sub> O <sub>2</sub> Pt <sub>2</sub> S <sub>2</sub> |
| Formula Weight               | 433.62                                                              | 1044.61                                                                                                      |
| Crystal System               | <i>triclinic</i>                                                    | <i>triclinic</i>                                                                                             |
| Space group                  | <i>P</i> 1                                                          | <i>P</i> 1                                                                                                   |
| a, b, c [Å]                  | 7.4987(6), 9.4330(7),<br>11.6092(9)                                 | 10.1219(11), 12.2233(13),<br>13.6071(15)                                                                     |
| α                            | 101.126(2)                                                          | 109.453(3)                                                                                                   |
| β                            | 103.873(2)                                                          | 95.228(3)                                                                                                    |
| γ                            | 98.613(2)                                                           | 96.489(3)                                                                                                    |
| V [Å <sup>3</sup> ]          | 765.50(10)                                                          | 1562.3(3)                                                                                                    |
| Z                            | 2                                                                   | 2                                                                                                            |
| D(calc) [g/cm <sup>3</sup> ] | 1.881                                                               | 2.221                                                                                                        |
| Mu(MoKa) [ /mm]              | 1.695                                                               | 9.455                                                                                                        |
| F(000)                       | 428                                                                 | 984                                                                                                          |
| Temperature (K)              | 293(2)                                                              | 293(2)                                                                                                       |
| Radiation [Å]                | 0.71073                                                             | 0.71073                                                                                                      |
| θ(Min-Max) [°]               | 2.554- 27.217                                                       | 1.943- 27.542                                                                                                |
| Dataset (h; k; l)            | -9 to 9, -12 to 12, -14 to 14                                       | -13 to 13, -15 to 15, -17 to 17                                                                              |
| R, wR <sub>2</sub>           | 0.0278, 0.0748                                                      | 0.0249, 0.0595                                                                                               |
| Goodness of fit(S)           | 1.094                                                               | 1.023                                                                                                        |
| CCDC No.                     | 2178572                                                             | 2178573                                                                                                      |

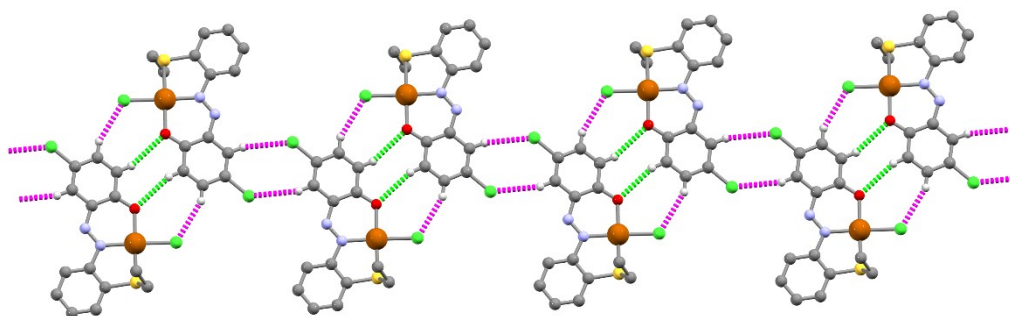**Figure S8:** 1-D supramolecular structure of **2** formed by Cl...H and O...H bonding interactions.

**Table S2:** Selected X-ray and calculated bond distances and angles of complexes **1** and **2**

| Bonds(Å)   | [Pd(L)Cl] ( <b>1</b> ) |         | [Pt(L)Cl] ( <b>2</b> ) |           |
|------------|------------------------|---------|------------------------|-----------|
|            | X-ray                  | Calc.   | X-ray                  | Calc.     |
| Pd1–N1     | 1.979(2)               | 2.017   | 1.966(3)               | 2.00813   |
| Pd1–O1     | 1.9960(18)             | 2.018   | 2.000(3)               | 2.02230   |
| Pd1–S1     | 2.2401(6)              | 2.301   | 2.2316(12)             | 2.29275   |
| Pd1–Cl1    | 2.3106(7)              | 2.341   | 2.3126(11)             | 2.35894   |
| Cl2–C4     | 1.738(3)               | 1.756   | 1.745(5)               | 1.75638   |
| S1–C12     | 1.771(3)               | 1.797   | 1.774(5)               | 1.79677   |
| S1–C13     | 1.821(3)               | 1.857   | 1.824(5)               | 1.85930   |
| O1–C1      | 1.291(3)               | 1.285   | 1.306(5)               | 1.29344   |
| N1–N2      | 1.270(3)               | 1.277   | 1.283(5)               | 1.27865   |
| N1–C7      | 1.448(3)               | 1.431   | 1.444(5)               | 1.43421   |
| Angles (°) |                        |         |                        |           |
| N1–Pd1–O1  | 93.06(8)               | 92.058  | 93.37(13)              | 92.52811  |
| N1–Pd1–S1  | 87.71(6)               | 86.946  | 87.64(10)              | 87.05536  |
| O1–Pd1–S1  | 178.54(6)              | 177.927 | 177.71(9)              | 178.30795 |
| N1–Pd1–Cl1 | 175.99(6)              | 176.199 | 176.21(10)             | 177.60868 |
| O1–Pd1–Cl1 | 90.84(5)               | 91.046  | 89.14(9)               | 89.26697  |
| S1–Pd1–Cl1 | 88.41(3)               | 90.019  | 89.96(4)               | 91.19538  |
| C12–S1–C13 | 102.64(12)             | 103.691 | 103.1(2)               | 103.55565 |
| C12–S1–Pd1 | 98.10(9)               | 97.325  | 98.38(15)              | 97.60226  |
| C13–S1–Pd1 | 106.66(9)              | 107.014 | 108.44(16)             | 107.83721 |
| N2–N1–Pd1  | 127.66(16)             | 127.164 | 128.1(3)               | 127.33641 |

**Table S3:** Energy and % of composition of some selected molecular orbitals of complex **1**

| MO      | Energy (eV) | % Composition |    |    |
|---------|-------------|---------------|----|----|
|         |             | Pd            | L  | Cl |
| LUMO+5  | -0.04       | 83            | 17 | 0  |
| LUMO+4  | -0.21       | 01            | 99 | 0  |
| LUMO+3  | -0.66       | 01            | 99 | 0  |
| LUMO+2  | -1.44       | 03            | 97 | 03 |
| LUMO+1  | -2.28       | 47            | 39 | 14 |
| LUMO    | -3.03       | 03            | 97 | 03 |
| HOMO    | -5.88       | 10            | 80 | 10 |
| HOMO-1  | -6.55       | 17            | 20 | 63 |
| HOMO-2  | -6.57       | 16            | 10 | 74 |
| HOMO-3  | -7.02       | 75            | 14 | 11 |
| HOMO-4  | -7.11       | 05            | 85 | 09 |
| HOMO-5  | -7.32       | 12            | 66 | 22 |
| HOMO-6  | -7.54       | 31            | 64 | 05 |
| HOMO-7  | -7.86       | 34            | 65 | 01 |
| HOMO-8  | -8.18       | 20            | 73 | 07 |
| HOMO-9  | -8.37       | 19            | 64 | 17 |
| HOMO-10 | -8.47       | 41            | 49 | 09 |

**Table S4:** Energy and % of composition of some selected molecular orbitals of complex **2**

| MO      | Energy (eV) | % Composition |    |    |
|---------|-------------|---------------|----|----|
|         |             | Pt            | L  | Cl |
| LUMO+5  | -0.04       | 51            | 48 | 01 |
| LUMO+4  | -0.23       | 01            | 99 | 0  |
| LUMO+3  | -0.68       | 01            | 99 | 0  |
| LUMO+2  | -1.46       | 06            | 93 | 01 |
| LUMO+1  | -1.50       | 44            | 45 | 11 |
| LUMO    | -3.01       | 05            | 95 | 0  |
| HOMO    | -5.81       | 17            | 70 | 13 |
| HOMO-1  | -6.49       | 22            | 35 | 42 |
| HOMO-2  | -6.55       | 21            | 07 | 72 |
| HOMO-3  | -6.96       | 90            | 07 | 03 |
| HOMO-4  | -7.12       | 13            | 76 | 11 |
| HOMO-5  | -7.36       | 25            | 65 | 09 |
| HOMO-6  | -7.48       | 18            | 57 | 25 |
| HOMO-7  | -7.82       | 17            | 80 | 02 |
| HOMO-8  | -8.16       | 20            | 69 | 11 |
| HOMO-9  | -8.42       | 28            | 53 | 19 |
| HOMO-10 | -8.48       | 26            | 61 | 13 |

**Table S5:** Vertical electronic transition calculated by TDDFT/CPCM method of complexes **1** and **2**

| Compd.   | $\lambda$<br>(nm) | E (eV) | Osc.<br>Strength<br>(f) | Key excitations  | Character  | $\lambda_{\text{expt.}}$ (nm)<br>( $\epsilon$ , $M^{-1}cm^{-1}$ ) |
|----------|-------------------|--------|-------------------------|------------------|------------|-------------------------------------------------------------------|
| <b>1</b> | 535.9             | 2.3134 | 0.1505                  | (84%)HOMO→LUMO   | ILCT       | 550 (12302)                                                       |
|          | 507.5             | 2.4429 | 0.0180                  | (82%)HOMO→LUMO+1 | LMCT/ ILCT | 520 (sh.)                                                         |
|          | 368.5             | 3.3643 | 0.0861                  | (67%)HOMO-1→LUMO | XLCT/MLCT  | 372 (sh.)                                                         |
|          | 348.4             | 3.5586 | 0.2497                  | (67%)HOMO-4→LUMO | ILCT       | 338 (18162)                                                       |
|          | 340.8             | 3.6383 | 0.0893                  | (66%)HOMO-5→LUMO | ILCT       |                                                                   |
| <b>2</b> | 544.1             | 2.2786 | 0.1444                  | (96%)HOMO→LUMO   | ILCT/MLCT  | 557 (15077)                                                       |
|          | 382.1             | 3.2452 | 0.0589                  | (72%)HOMO-1→LUMO | XLCT/MLCT  | 374 (sh.)                                                         |
|          | 353.0             | 3.5123 | 0.2993                  | (78%)HOMO-4→LUMO | ILCT       | 343 (23742)                                                       |
|          | 336.1             | 3.6893 | 0.1345                  | (75%)HOMO-5→LUMO | ILCT       |                                                                   |

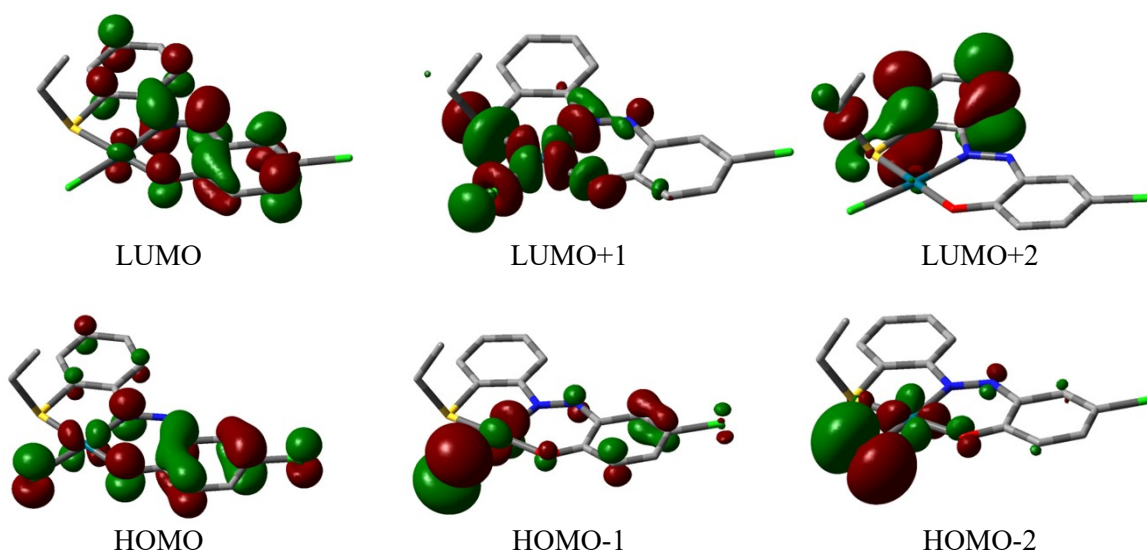**Figure S9:** Contour plots of some selected molecular orbital of Pd(II) complex (**1**)



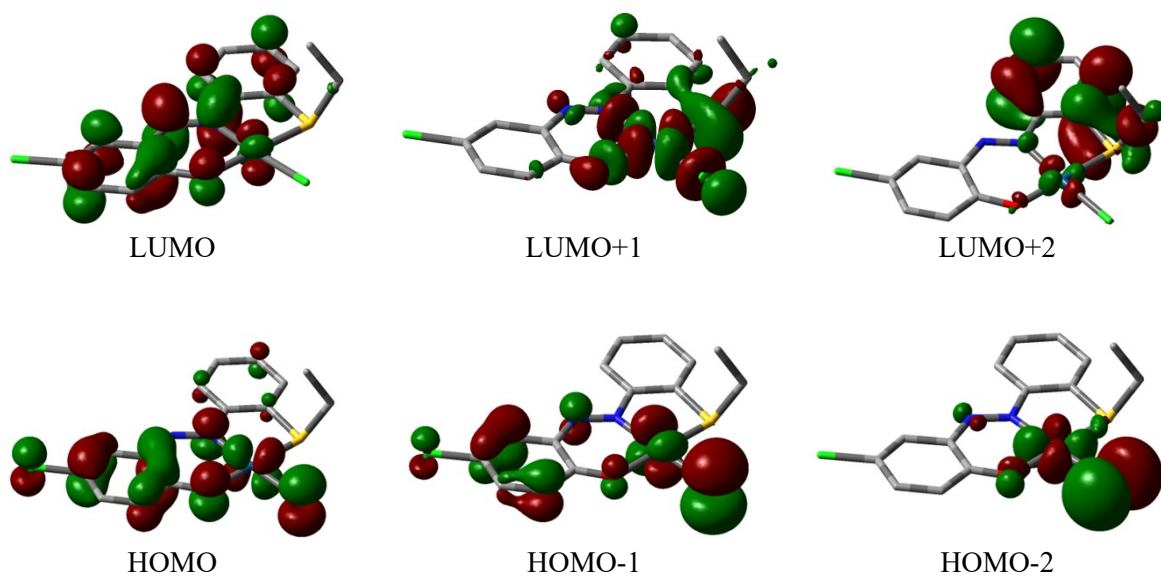

**Figure S10:** Contour plots of some selected molecular orbital of **Pt(II)** complex (**2**)

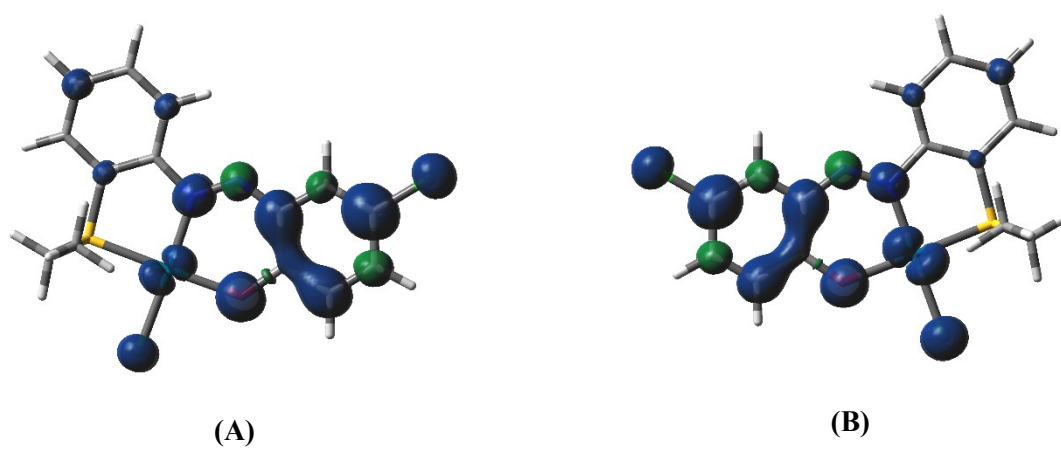

**Figure S11:** Spin density plots of (A)  $1^+$  and (B)  $2^+$

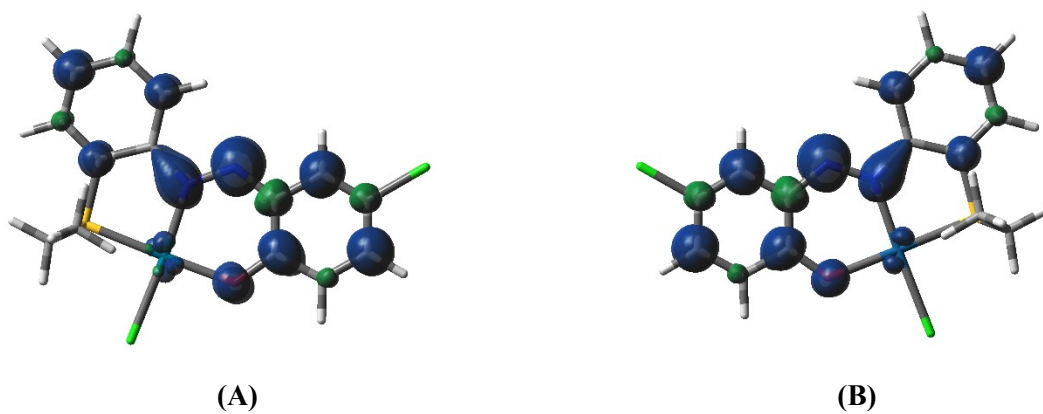

Figure S12: Spin density plots of (A) 1<sup>-</sup> and (B) 2<sup>-</sup>

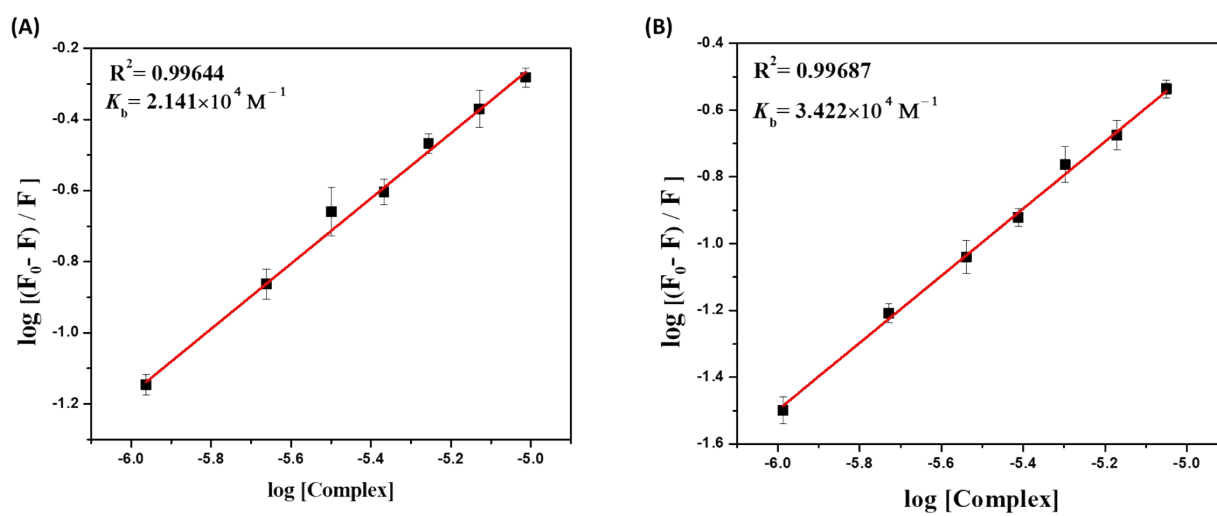

Figure S13: Plot of  $\log [(F_0 - F) / F]$  versus  $\log [\text{complex}]$  of Pd(II) complex (A) and Pt(II) complex (B)

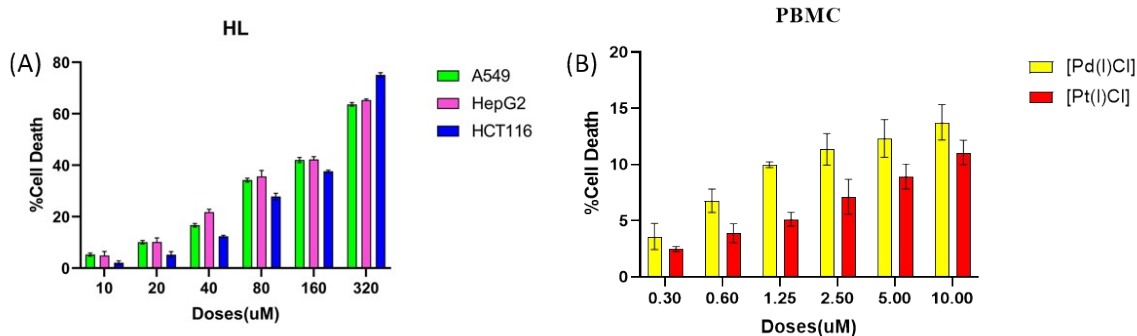

**Figure S14:** (A) Viability of A549, HepG2 and HCT116 cells were assessed by treating different doses of HL, (B) The effects of [Pd(L)Cl] (1) and [Pt(L)Cl] (2) in peripheral blood mononuclear cells (PBMCs).

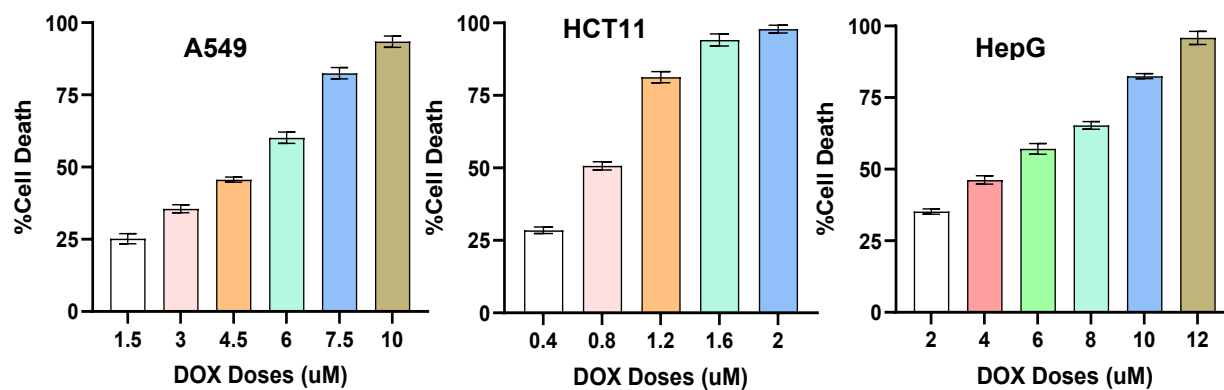

**Figure S15:** Viability of A549, HepG2 and HCT116 cells were assessed by treating different doses of Doxorubicin (Dox)
